# Supplementary material
Source: Royal Society of Chemistry journal article supplement (doi:10.1039/d6lc00058d)
Supplement: d6lc00058d1.xlsx [file d6lc00058d1.xlsx]

## Sheet: Exclusion
Date	Strain	Type	Timepoint	Sample number	Excluded?	Morphology	Baseline EthD-1	Image quality
2025-05-17	0	Control	0	1	TRUE	FALSE	TRUE	FALSE
2025-05-17	0	Control	0	2	TRUE	FALSE	TRUE	FALSE
2025-05-17	0	Control	0	4	TRUE	FALSE	TRUE	FALSE
2025-05-17	0	Control	0	5	TRUE	FALSE	TRUE	FALSE
2025-05-17	0	Control	0	6		FALSE	FALSE	FALSE
2025-05-17	0	Control	0	3		FALSE	FALSE	FALSE
2025-05-19	0	Control	0	1	TRUE	FALSE	TRUE	FALSE
2025-05-19	0	Control	0	2	TRUE	FALSE	TRUE	FALSE
2025-05-19	0	Control	0	3	TRUE	FALSE	FALSE	TRUE
2025-05-19	0	Control	0	4		FALSE	FALSE	FALSE
2025-05-19	0	Control	0	5	TRUE	FALSE	TRUE	FALSE
2025-05-19	0	Control	0	6	TRUE	TRUE	TRUE	FALSE
2025-06-09	0	Control	0	1		FALSE	FALSE	FALSE
2025-06-09	0	Control	0	2	TRUE	FALSE	TRUE	FALSE
2025-06-09	0	Control	0	3	TRUE	FALSE	TRUE	FALSE
2025-06-09	0	Control	0	4		FALSE	FALSE	FALSE
2025-06-09	0	Control	0	5		FALSE	FALSE	FALSE
2025-06-09	0	Control	0	6		FALSE	FALSE	FALSE
2025-05-13	0	Control	24	1	TRUE	FALSE	FALSE	TRUE
2025-05-13	0	Control	24	2	TRUE	FALSE	FALSE	TRUE
2025-05-13	0	Control	24	3	TRUE	FALSE	FALSE	TRUE
2025-05-13	0	Control	24	4	TRUE	FALSE	FALSE	TRUE
2025-05-13	0	Control	24	5	TRUE	FALSE	FALSE	TRUE
2025-05-13	0	Control	24	6	TRUE	FALSE	FALSE	TRUE
2025-05-15	0	Control	24	1	TRUE	FALSE	FALSE	TRUE
2025-05-15	0	Control	24	2	TRUE	TRUE	TRUE	FALSE
2025-05-15	0	Control	24	3		FALSE	FALSE	FALSE
2025-05-15	0	Control	24	4	TRUE	FALSE	TRUE	FALSE
2025-05-15	0	Control	24	5	TRUE	FALSE	FALSE	TRUE
2025-05-15	0	Control	24	6	TRUE	FALSE	TRUE	FALSE
2025-06-13	0	Control	24	1		FALSE	FALSE	FALSE
2025-06-13	0	Control	24	2	TRUE	TRUE	TRUE	FALSE
2025-06-13	0	Control	24	3		FALSE	FALSE	FALSE
2025-06-13	0	Control	24	4		FALSE	FALSE	FALSE
2025-06-13	0	Control	24	5	TRUE	FALSE	TRUE	FALSE
2025-06-13	0	Control	24	6	TRUE	FALSE	TRUE	FALSE
2024-03-12	25	Impact	0	1		FALSE	FALSE	FALSE
2024-03-12	25	Impact	0	2		FALSE	FALSE	FALSE
2024-03-12	25	Impact	0	3		FALSE	FALSE	FALSE
2024-03-12	25	Impact	0	4	TRUE	FALSE	TRUE	FALSE
2024-03-12	25	IMO	0	1		FALSE	FALSE	FALSE
2024-03-12	25	IMO	0	2		FALSE	FALSE	FALSE
2025-05-20	25	Impact	0	1	TRUE	FALSE	TRUE	FALSE
2025-05-20	25	Impact	0	2	TRUE	FALSE	TRUE	FALSE
2025-05-20	25	Impact	0	3	TRUE	FALSE	TRUE	FALSE
2025-05-20	25	Impact	0	4	TRUE	FALSE	TRUE	TRUE
2025-05-20	25	IMO	0	1	TRUE	FALSE	TRUE	FALSE
2025-05-20	25	IMO	0	2	TRUE	FALSE	TRUE	FALSE
2025-06-11	25	Impact	0	1	TRUE	FALSE	TRUE	FALSE
2025-06-11	25	Impact	0	2		FALSE	FALSE	FALSE
2025-06-11	25	Impact	0	3		FALSE	FALSE	FALSE
2025-06-11	25	Impact	0	4		FALSE	FALSE	FALSE
2025-06-11	25	IMO	0	1		FALSE	FALSE	FALSE
2025-06-11	25	IMO	0	2		FALSE	FALSE	FALSE
2025-07-15	25	Impact	24	1		FALSE	FALSE	FALSE
2025-07-15	25	Impact	24	2	TRUE	TRUE	TRUE	FALSE
2025-07-15	25	Impact	24	3	TRUE	TRUE	TRUE	FALSE
2025-07-15	25	Impact	24	4	TRUE	TRUE	TRUE	FALSE
2025-07-15	25	IMO	24	1		FALSE	FALSE	FALSE
2025-07-15	25	IMO	24	2		FALSE	FALSE	FALSE
2024-07-16	25	Impact	24	1	TRUE	TRUE	FALSE	TRUE
2024-07-16	25	Impact	24	2	TRUE	FALSE	TRUE	FALSE
2024-07-16	25	Impact	24	3	TRUE	FALSE	FALSE	TRUE
2024-07-16	25	Impact	24	4	TRUE	FALSE	FALSE	TRUE
2024-07-16	25	IMO	24	1	TRUE	FALSE	FALSE	TRUE
2024-07-16	25	IMO	24	2	TRUE	TRUE	FALSE	TRUE
2025-07-17	25	Impact	24	1		FALSE	FALSE	FALSE
2025-07-17	25	Impact	24	2		FALSE	FALSE	FALSE
2025-07-17	25	Impact	24	3		FALSE	FALSE	FALSE
2025-07-17	25	Impact	24	4		FALSE	FALSE	FALSE
2025-07-17	25	IMO	24	1		FALSE	FALSE	FALSE
2025-07-17	25	IMO	24	2		FALSE	FALSE	FALSE
							Excluded spheroids	42
							Used spheroids	30
							Morphology	8
							Baseline EthD-1	28
							Image quality	15
