# Supplementary material
Source: Royal Society of Chemistry journal article supplement (doi:10.1039/d6lc00058d)
Supplement: d6lc00058d2.xlsx [file d6lc00058d2.xlsx]

## Sheet: Calibration
Date	x1	y1	x2	y2	x3	y3	x4	y4	x5	y5	Target pressure (mbar)	Setpoint (mbar)	Max pressure (mbar)
2025-05-17	0	NA	100	NA	200	NA	300	NA	400	NA	NA	NA	NA
2025-05-19	0	NA	100	NA	200	NA	300	NA	400	NA	NA	NA	NA
2025-06-09	0	NA	100	NA	200	NA	300	NA	400	NA	NA	NA	NA
2025-05-12	0	NA	100	NA	200	NA	300	NA	400	NA	NA	NA	NA
2025-05-15	0	NA	100	NA	200	NA	300	NA	400	NA	NA	NA	NA
2025-06-13	0	NA	100	NA	200	NA	300	NA	400	NA	NA	NA	NA
2024-03-12	0	469.5	100	434.7	200	389.28	300	338.02	400	302.58	616.82	650	620
2025-05-20	0	434	100	400	200	356	300	314	400	278	574.15	600	596
2025-06-11	0	468.05	100	452	200	401.18	300	369.12	400	330.98	715.27	725	760.72
2025-07-15	0	481.84	300	443.26	600	409.1	900	386.36	1200	350.78	2846.68	2800	2869.6
2024-07-16	0	488.42	100	425	200	386.86	300	364.88	400	336.94	746.67	770	753
2025-07-16	0	460.5	300	436.72	600	387.32	900	309.3	1200	271.44	1887.15	1900	2098.38
