# Supplementary material
Source: Royal Society of Chemistry journal article supplement (doi:10.1039/d6lc00058d)
Supplement: d6lc00058d3.xlsx [file d6lc00058d3.xlsx]

## Sheet: Strain
Date	Type	Timepoint	Major	Minor	Avg Size	Strain	Pulse width (s)	Strain rate (s-1)
2025-05-17	Control	0	272.955	265.006	268.981	0	NA	NA
	Control	0	233.124	233.124	233.124	0	NA	NA
	Control	0	237.773	228.544	233.159	0	NA	NA
	Control	0	241.128	233.128	237.128	0	NA	NA
	Control	0	289.609	268.336	278.972	0	NA	NA
	Control	0	267.06	229.134	248.097	0	NA	NA
2025-05-19	Control	0	246.624	244.463	245.543	0	NA	NA
	Control	0	295.927	287.364	291.645	0	NA	NA
	Control	0	233.704	225.121	229.413	0	NA	NA
	Control	0	268.767	255.868	262.317	0	NA	NA
	Control	0	246.576	246.576	246.576	0	NA	NA
	Control	0	257.336	253.028	255.182	0	NA	NA
2025-06-09	Control	0	270.069	260.139	265.104	0	NA	NA
	Control	0	238.223	238.223	238.223	0	NA	NA
	Control	0	269.365	265.087	267.226	0	NA	NA
	Control	0	256.624	250.2	253.412	0	NA	NA
	Control	0	292.688	241.783	267.236	0	NA	NA
	Control	0	272.872	268.592	270.732	0	NA	NA
2025-05-13	Control	24	282.615	264.98	273.798	0	NA	NA
	Control	24	284.813	276.735	280.774	0	NA	NA
	Control	24	313.539	289.23	301.385	0	NA	NA
	Control	24	305.374	297.338	301.356	0	NA	NA
	Control	24	304.67	275.941	290.305	0	NA	NA
	Control	24	320.138	293.647	306.892	0	NA	NA
2025-05-15	Control	24	332.772	311.973	322.373	0	NA	NA
	Control	24	273.457	256.547	265.002	0	NA	NA
	Control	24	316.61	314.278	315.444	0	NA	NA
	Control	24	288.868	281.961	285.414	0	NA	NA
	Control	24	350.498	329.69	340.094	0	NA	NA
	Control	24	288.875	286.572	287.724	0	NA	NA
2025-06-13	Control	24	257.714	245.414	251.564	0	NA	NA
	Control	24	265.914	255.702	260.808	0	NA	NA
	Control	24	265.891	251.592	258.742	0	NA	NA
	Control	24	271.435	261.818	266.626	0	NA	NA
	Control	24	251.591	248.196	249.894	0	NA	NA
	Control	24	284.32	280.211	282.265	0	NA	NA
2024-03-12	Impact	0	294.781	275.111	284.946	0.28	0.138	2.02899
	Impact	0	278.408	254.823	266.615	0.23	0.138	1.66667
	Impact	0	269.223	269.223	269.223	0.24	0.138	1.73913
	Impact	0	298.684	260.724	279.704	0.26	0.138	1.88406
	IMO	0	289.56	269.268	279.414	NA	NA	NA
	IMO	0	279.07	273.195	276.132	NA	NA	NA
2025-05-20	Impact	0	290.437	273.69	282.063	0.3	0.06	5
	Impact	0	276.623	271.508	274.065	0.28	0.06	4.66667
	Impact	0	270.718	266.388	268.553	0.26	0.06	4.33333
	Impact	0	281.681	279.478	280.579	0.29	0.06	4.83333
	IMO	0	267.831	259.831	263.831	NA	NA	NA
	IMO	0	270.718	266.388	268.553	NA	NA	NA
2025-06-11	Impact	0	274.899	274.899	274.899	0.27	0.1	2.7
	Impact	0	309.364	279.909	294.636	0.32	0.1	3.2
	Impact	0	318.683	312.212	315.447	0.36	0.1	3.6
	Impact	0	273.426	273.426	273.426	0.27	0.1	2.7
	IMO	0	284.232	260.527	272.38	NA	NA	NA
	IMO	0	294.957	271.292	283.125	NA	NA	NA
2025-07-15	Impact	24	256.52	218.26	237.39	0.25	0.12	2.08333
	Impact	24	222.76	216.03	219.395	0.18	0.12	1.5
	Impact	24	247.48	204.73	226.105	0.21	0.12	1.75
	Impact	24	259.52	228.78	244.15	0.27	0.12	2.25
	IMO	24	258.75	249.75	254.25	NA	NA	NA
	IMO	24	229.56	204.76	217.16	NA	NA	NA
2024-07-16	Impact	24	270.16	211.022	240.591	0.21	0.158	1.32911
	Impact	24	285.91	274.768	280.339	0.32	0.158	2.02532
	Impact	24	251.75	249.12	250.435	0.24	0.158	1.51899
	Impact	24	251.73	245.206	248.468	0.24	0.158	1.51899
	IMO	24	264.24	258.331	261.286	NA	NA	NA
	IMO	24	270.13	241.92	256.025	NA	NA	NA
2025-07-17	Impact	24	238.47	193.54	216.005	0.44	0.122	3.60656
	Impact	24	184.58	176.28	180.43	0.44	0.122	3.60656
	Impact	24	203.93	174.9	189.415	0.39	0.122	3.19672
	Impact	24	220.51	186.65	203.58	0.46	0.122	3.77049
	IMO	24	179.72	162.49	171.105	NA	NA	NA
	IMO	24	184.598	169.985	177.292	NA	NA	NA
					Average	0.292083	0.116333	2.77118
					STDEV	0.0739921	0.0307986	1.14579
