# Supplementary material
Source: Royal Society of Chemistry journal article supplement (doi:10.1039/d6lc00058d)
Supplement: d6lc00058d4.pdf [file d6lc00058d4.pdf]

## **Supplementary Information – Traumatic brain injury on-a-chip: a microfluidic device for the compression of cortical spheroids**

**Mauricio Araiza Canizales<sup>a</sup>, Alexander McGhee<sup>b</sup>, Yang Wan<sup>c</sup>, Jing Zhang<sup>a</sup>, Emily Blick<sup>d</sup>, Rafael D. González-Cruz<sup>efg</sup>, Diane Hoffman-Kim<sup>efg</sup>, Haneesh Kesari<sup>c</sup> and Christian Franck<sup>a</sup>.**

<sup>a</sup>Department of Mechanical Engineering, University of Wisconsin-Madison, Madison, US.

<sup>b</sup>Department of Biomedical Engineering, University of Arizona, Tucson, US.

<sup>c</sup>School of Engineering, Brown University, Providence, US.

<sup>d</sup>Department of Biomedical Engineering, University of Wisconsin-Madison, Madison, US.

<sup>e</sup>Department of Neuroscience, Brown University, Providence, US.

<sup>f</sup>Carney Institute for Brain Science, Brown University, Providence, US.

<sup>g</sup>Institute for Biology, Engineering, and Medicine, Brown University, Providence, US.

## Materials and methods

### Inducing compressive injury in cortical spheroids

**Table 1:** Calibration data used for compression experiments of cortical spheroids.

| Date      | x1 | y1     | x2  | y2     | x3  | y3     | x4  | y4     | x5   | y5     | Target pressure (mbar) | Setpoint (mbar) | Max pressure (mbar) |
|-----------|----|--------|-----|--------|-----|--------|-----|--------|------|--------|------------------------|-----------------|---------------------|
| 5/17/2025 | 0  | NA     | 100 | NA     | 200 | NA     | 300 | NA     | 400  | NA     | NA                     | NA              | NA                  |
| 5/19/2025 | 0  | NA     | 100 | NA     | 200 | NA     | 300 | NA     | 400  | NA     | NA                     | NA              | NA                  |
| 6/9/2025  | 0  | NA     | 100 | NA     | 200 | NA     | 300 | NA     | 400  | NA     | NA                     | NA              | NA                  |
| 5/12/2025 | 0  | NA     | 100 | NA     | 200 | NA     | 300 | NA     | 400  | NA     | NA                     | NA              | NA                  |
| 5/15/2025 | 0  | NA     | 100 | NA     | 200 | NA     | 300 | NA     | 400  | NA     | NA                     | NA              | NA                  |
| 6/13/2025 | 0  | NA     | 100 | NA     | 200 | NA     | 300 | NA     | 400  | NA     | NA                     | NA              | NA                  |
| 3/12/2024 | 0  | 469.5  | 100 | 434.7  | 200 | 389.28 | 300 | 338.02 | 400  | 302.58 | 616.82                 | 650             | 620                 |
| 5/20/2025 | 0  | 434    | 100 | 400    | 200 | 356    | 300 | 314    | 400  | 278    | 574.15                 | 600             | 596                 |
| 6/11/2025 | 0  | 468.05 | 100 | 452    | 200 | 401.18 | 300 | 369.12 | 400  | 330.98 | 715.27                 | 725             | 760.72              |
| 7/15/2025 | 0  | 481.84 | 300 | 443.26 | 600 | 409.1  | 900 | 386.36 | 1200 | 350.78 | 2846.68                | 2800            | 2869.6              |
| 7/16/2024 | 0  | 488.42 | 100 | 425    | 200 | 386.86 | 300 | 364.88 | 400  | 336.94 | 746.67                 | 770             | 753                 |
| 7/16/2025 | 0  | 460.5  | 300 | 436.72 | 600 | 387.32 | 900 | 309.3  | 1200 | 271.44 | 1887.15                | 1900            | 2098.38             |

**Table 2:** Cortical spheroid size and inferred strain and strain rate from compression experiments.

| Date      | Type    | Timepoint | Major   | Minor   | Avg Size | Strain | Pulse width (s) | Strain rate (s <sup>-1</sup> ) |
|-----------|---------|-----------|---------|---------|----------|--------|-----------------|--------------------------------|
| 5/17/2025 | Control | 0         | 272.955 | 265.006 | 269.0    | 0      | NA              | NA                             |
|           | Control | 0         | 233.124 | 233.124 | 233.1    | 0      | NA              | NA                             |
|           | Control | 0         | 237.773 | 228.544 | 233.2    | 0      | NA              | NA                             |
|           | Control | 0         | 241.128 | 233.128 | 237.1    | 0      | NA              | NA                             |
|           | Control | 0         | 289.609 | 268.336 | 279.0    | 0      | NA              | NA                             |
|           | Control | 0         | 267.06  | 229.134 | 248.1    | 0      | NA              | NA                             |
| 5/19/2025 | Control | 0         | 246.624 | 244.463 | 245.5    | 0      | NA              | NA                             |
|           | Control | 0         | 295.927 | 287.364 | 291.6    | 0      | NA              | NA                             |
|           | Control | 0         | 233.704 | 225.121 | 229.4    | 0      | NA              | NA                             |
|           | Control | 0         | 268.767 | 255.868 | 262.3    | 0      | NA              | NA                             |
|           | Control | 0         | 246.576 | 246.576 | 246.6    | 0      | NA              | NA                             |
|           | Control | 0         | 257.336 | 253.028 | 255.2    | 0      | NA              | NA                             |
| 6/9/2025  | Control | 0         | 270.069 | 260.139 | 265.1    | 0      | NA              | NA                             |
|           | Control | 0         | 238.223 | 238.223 | 238.2    | 0      | NA              | NA                             |
|           | Control | 0         | 269.365 | 265.087 | 267.2    | 0      | NA              | NA                             |
|           | Control | 0         | 256.624 | 250.2   | 253.4    | 0      | NA              | NA                             |
|           | Control | 0         | 292.688 | 241.783 | 267.2    | 0      | NA              | NA                             |
|           | Control | 0         | 272.872 | 268.592 | 270.7    | 0      | NA              | NA                             |
| 5/13/2025 | Control | 24        | 282.615 | 264.98  | 273.8    | 0      | NA              | NA                             |
|           | Control | 24        | 284.813 | 276.735 | 280.8    | 0      | NA              | NA                             |
|           | Control | 24        | 313.539 | 289.23  | 301.4    | 0      | NA              | NA                             |
|           | Control | 24        | 305.374 | 297.338 | 301.4    | 0      | NA              | NA                             |
|           | Control | 24        | 304.67  | 275.941 | 290.3    | 0      | NA              | NA                             |
|           | Control | 24        | 320.138 | 293.647 | 306.9    | 0      | NA              | NA                             |
| 5/15/2025 | Control | 24        | 332.772 | 311.973 | 322.4    | 0      | NA              | NA                             |
|           | Control | 24        | 273.457 | 256.547 | 265.0    | 0      | NA              | NA                             |
|           | Control | 24        | 316.61  | 314.278 | 315.4    | 0      | NA              | NA                             |

| Date      | Type    | Timepoint | Major   | Minor   | Avg Size | Strain | Pulse width (s) | Strain rate (s-1) |
|-----------|---------|-----------|---------|---------|----------|--------|-----------------|-------------------|
| 6/13/2025 | Control | 24        | 288.868 | 281.961 | 285.4    | 0      | NA              | NA                |
|           | Control | 24        | 350.498 | 329.69  | 340.1    | 0      | NA              | NA                |
|           | Control | 24        | 288.875 | 286.572 | 287.7    | 0      | NA              | NA                |
|           | Control | 24        | 257.714 | 245.414 | 251.6    | 0      | NA              | NA                |
|           | Control | 24        | 265.914 | 255.702 | 260.8    | 0      | NA              | NA                |
|           | Control | 24        | 265.891 | 251.592 | 258.7    | 0      | NA              | NA                |
|           | Control | 24        | 271.435 | 261.818 | 266.6    | 0      | NA              | NA                |
|           | Control | 24        | 251.591 | 248.196 | 249.9    | 0      | NA              | NA                |
| 3/12/2024 | Control | 24        | 284.32  | 280.211 | 282.3    | 0      | NA              | NA                |
|           | Impact  | 0         | 294.781 | 275.111 | 284.9    | 0.28   | 0.138           | 2.03              |
|           | Impact  | 0         | 278.408 | 254.823 | 266.6    | 0.23   | 0.138           | 1.67              |
|           | Impact  | 0         | 269.223 | 269.223 | 269.2    | 0.24   | 0.138           | 1.74              |
|           | Impact  | 0         | 298.684 | 260.724 | 279.7    | 0.26   | 0.138           | 1.88              |
| 5/20/2025 | IMO     | 0         | 289.56  | 269.268 | 279.4    | NA     | NA              | NA                |
|           | IMO     | 0         | 279.07  | 273.195 | 276.1    | NA     | NA              | NA                |
|           | Impact  | 0         | 290.437 | 273.69  | 282.1    | 0.3    | 0.06            | 5.00              |
|           | Impact  | 0         | 276.623 | 271.508 | 274.1    | 0.28   | 0.06            | 4.67              |
|           | Impact  | 0         | 270.718 | 266.388 | 268.6    | 0.26   | 0.06            | 4.33              |
|           | Impact  | 0         | 281.681 | 279.478 | 280.6    | 0.29   | 0.06            | 4.83              |
|           | IMO     | 0         | 267.831 | 259.831 | 263.8    | NA     | NA              | NA                |
|           | IMO     | 0         | 270.718 | 266.388 | 268.6    | NA     | NA              | NA                |
| 6/11/2025 | Impact  | 0         | 274.899 | 274.899 | 274.9    | 0.27   | 0.1             | 2.70              |
|           | Impact  | 0         | 309.364 | 279.909 | 294.6    | 0.32   | 0.1             | 3.20              |
|           | Impact  | 0         | 318.683 | 312.212 | 315.4    | 0.36   | 0.1             | 3.60              |
|           | Impact  | 0         | 273.426 | 273.426 | 273.4    | 0.27   | 0.1             | 2.70              |
|           | IMO     | 0         | 284.232 | 260.527 | 272.4    | NA     | NA              | NA                |
|           | IMO     | 0         | 294.957 | 271.292 | 283.1    | NA     | NA              | NA                |
| 7/15/2025 | Impact  | 24        | 256.52  | 218.26  | 237.4    | 0.25   | 0.12            | 2.08              |
|           | Impact  | 24        | 222.76  | 216.03  | 219.4    | 0.18   | 0.12            | 1.50              |

| Date      | Type   | Timepoint | Major   | Minor   | Avg Size | Strain | Pulse width (s) | Strain rate (s-1) |
|-----------|--------|-----------|---------|---------|----------|--------|-----------------|-------------------|
| 7/16/2024 | Impact | 24        | 247.48  | 204.73  | 226.1    | 0.21   | 0.12            | 1.75              |
|           | Impact | 24        | 259.52  | 228.78  | 244.2    | 0.27   | 0.12            | 2.25              |
|           | IMO    | 24        | 258.75  | 249.75  | 254.3    | NA     | NA              | NA                |
|           | IMO    | 24        | 229.56  | 204.76  | 217.2    | NA     | NA              | NA                |
|           | Impact | 24        | 270.16  | 211.022 | 240.6    | 0.21   | 0.158           | 1.33              |
|           | Impact | 24        | 285.91  | 274.768 | 280.3    | 0.32   | 0.158           | 2.03              |
|           | Impact | 24        | 251.75  | 249.12  | 250.4    | 0.24   | 0.158           | 1.52              |
|           | Impact | 24        | 251.73  | 245.206 | 248.5    | 0.24   | 0.158           | 1.52              |
|           | IMO    | 24        | 264.24  | 258.331 | 261.3    | NA     | NA              | NA                |
| 7/17/2025 | IMO    | 24        | 270.13  | 241.92  | 256.0    | NA     | NA              | NA                |
|           | Impact | 24        | 238.47  | 193.54  | 216.0    | 0.44   | 0.122           | 3.61              |
|           | Impact | 24        | 184.58  | 176.28  | 180.4    | 0.44   | 0.122           | 3.61              |
|           | Impact | 24        | 203.93  | 174.9   | 189.4    | 0.39   | 0.122           | 3.20              |
|           | Impact | 24        | 220.51  | 186.65  | 203.6    | 0.46   | 0.122           | 3.77              |
|           | IMO    | 24        | 179.72  | 162.49  | 171.1    | NA     | NA              | NA                |
|           | IMO    | 24        | 184.598 | 169.985 | 177.3    | NA     | NA              | NA                |
|           |        |           |         |         | Average  | 0.29   | 0.12            | 2.77              |
|           |        |           |         |         | STDEV    | 0.07   | 0.03            | 1.15              |

**Table 3:** Summary of excluded cortical spheroids based on morphology, their baseline viability, as well as the image quality.

| Date      | Strain | Type    | Timepoint | Sample number | Excluded? | Morphology | Baseline EthD-1 | Image quality |
|-----------|--------|---------|-----------|---------------|-----------|------------|-----------------|---------------|
| 5/17/2025 | 0      | Control | 0         | 1             | TRUE      | FALSE      | TRUE            | FALSE         |
| 5/17/2025 | 0      | Control | 0         | 2             | TRUE      | FALSE      | TRUE            | FALSE         |
| 5/17/2025 | 0      | Control | 0         | 4             | TRUE      | FALSE      | TRUE            | FALSE         |
| 5/17/2025 | 0      | Control | 0         | 5             | TRUE      | FALSE      | TRUE            | FALSE         |
| 5/17/2025 | 0      | Control | 0         | 6             |           | FALSE      | FALSE           | FALSE         |
| 5/17/2025 | 0      | Control | 0         | 3             |           | FALSE      | FALSE           | FALSE         |
| 5/19/2025 | 0      | Control | 0         | 1             | TRUE      | FALSE      | TRUE            | FALSE         |
| 5/19/2025 | 0      | Control | 0         | 2             | TRUE      | FALSE      | TRUE            | FALSE         |
| 5/19/2025 | 0      | Control | 0         | 3             | TRUE      | FALSE      | FALSE           | TRUE          |
| 5/19/2025 | 0      | Control | 0         | 4             |           | FALSE      | FALSE           | FALSE         |
| 5/19/2025 | 0      | Control | 0         | 5             | TRUE      | FALSE      | TRUE            | FALSE         |
| 5/19/2025 | 0      | Control | 0         | 6             | TRUE      | TRUE       | TRUE            | FALSE         |
| 6/9/2025  | 0      | Control | 0         | 1             |           | FALSE      | FALSE           | FALSE         |
| 6/9/2025  | 0      | Control | 0         | 2             | TRUE      | FALSE      | TRUE            | FALSE         |
| 6/9/2025  | 0      | Control | 0         | 3             | TRUE      | FALSE      | TRUE            | FALSE         |
| 6/9/2025  | 0      | Control | 0         | 4             |           | FALSE      | FALSE           | FALSE         |
| 6/9/2025  | 0      | Control | 0         | 5             |           | FALSE      | FALSE           | FALSE         |
| 6/9/2025  | 0      | Control | 0         | 6             |           | FALSE      | FALSE           | FALSE         |
| 5/13/2025 | 0      | Control | 24        | 1             | TRUE      | FALSE      | FALSE           | TRUE          |
| 5/13/2025 | 0      | Control | 24        | 2             | TRUE      | FALSE      | FALSE           | TRUE          |
| 5/13/2025 | 0      | Control | 24        | 3             | TRUE      | FALSE      | FALSE           | TRUE          |
| 5/13/2025 | 0      | Control | 24        | 4             | TRUE      | FALSE      | FALSE           | TRUE          |
| 5/13/2025 | 0      | Control | 24        | 5             | TRUE      | FALSE      | FALSE           | TRUE          |
| 5/13/2025 | 0      | Control | 24        | 6             | TRUE      | FALSE      | FALSE           | TRUE          |
| 5/15/2025 | 0      | Control | 24        | 1             | TRUE      | FALSE      | FALSE           | TRUE          |
| 5/15/2025 | 0      | Control | 24        | 2             | TRUE      | TRUE       | TRUE            | FALSE         |
| 5/15/2025 | 0      | Control | 24        | 3             |           | FALSE      | FALSE           | FALSE         |
| 5/15/2025 | 0      | Control | 24        | 4             | TRUE      | FALSE      | TRUE            | FALSE         |
| 5/15/2025 | 0      | Control | 24        | 5             | TRUE      | FALSE      | FALSE           | TRUE          |

|           |    |         |    |   |      |       |       |       |
|-----------|----|---------|----|---|------|-------|-------|-------|
| 5/15/2025 | 0  | Control | 24 | 6 | TRUE | FALSE | TRUE  | FALSE |
| 6/13/2025 | 0  | Control | 24 | 1 |      | FALSE | FALSE | FALSE |
| 6/13/2025 | 0  | Control | 24 | 2 | TRUE | TRUE  | TRUE  | FALSE |
| 6/13/2025 | 0  | Control | 24 | 3 |      | FALSE | FALSE | FALSE |
| 6/13/2025 | 0  | Control | 24 | 4 |      | FALSE | FALSE | FALSE |
| 6/13/2025 | 0  | Control | 24 | 5 | TRUE | FALSE | TRUE  | FALSE |
| 6/13/2025 | 0  | Control | 24 | 6 | TRUE | FALSE | TRUE  | FALSE |
| 3/12/2024 | 25 | Impact  | 0  | 1 |      | FALSE | FALSE | FALSE |
| 3/12/2024 | 25 | Impact  | 0  | 2 |      | FALSE | FALSE | FALSE |
| 3/12/2024 | 25 | Impact  | 0  | 3 |      | FALSE | FALSE | FALSE |
| 3/12/2024 | 25 | Impact  | 0  | 4 | TRUE | FALSE | TRUE  | FALSE |
| 3/12/2024 | 25 | IMO     | 0  | 1 |      | FALSE | FALSE | FALSE |
| 3/12/2024 | 25 | IMO     | 0  | 2 |      | FALSE | FALSE | FALSE |
| 5/20/2025 | 25 | Impact  | 0  | 1 | TRUE | FALSE | TRUE  | FALSE |
| 5/20/2025 | 25 | Impact  | 0  | 2 | TRUE | FALSE | TRUE  | FALSE |
| 5/20/2025 | 25 | Impact  | 0  | 3 | TRUE | FALSE | TRUE  | FALSE |
| 5/20/2025 | 25 | Impact  | 0  | 4 | TRUE | FALSE | TRUE  | TRUE  |
| 5/20/2025 | 25 | IMO     | 0  | 1 | TRUE | FALSE | TRUE  | FALSE |
| 5/20/2025 | 25 | IMO     | 0  | 2 | TRUE | FALSE | TRUE  | FALSE |
| 6/11/2025 | 25 | Impact  | 0  | 1 | TRUE | FALSE | TRUE  | FALSE |
| 6/11/2025 | 25 | Impact  | 0  | 2 |      | FALSE | FALSE | FALSE |
| 6/11/2025 | 25 | Impact  | 0  | 3 |      | FALSE | FALSE | FALSE |
| 6/11/2025 | 25 | Impact  | 0  | 4 |      | FALSE | FALSE | FALSE |
| 6/11/2025 | 25 | IMO     | 0  | 1 |      | FALSE | FALSE | FALSE |
| 6/11/2025 | 25 | IMO     | 0  | 2 |      | FALSE | FALSE | FALSE |
| 7/15/2025 | 25 | Impact  | 24 | 1 |      | FALSE | FALSE | FALSE |
| 7/15/2025 | 25 | Impact  | 24 | 2 | TRUE | TRUE  | TRUE  | FALSE |
| 7/15/2025 | 25 | Impact  | 24 | 3 | TRUE | TRUE  | TRUE  | FALSE |
| 7/15/2025 | 25 | Impact  | 24 | 4 | TRUE | TRUE  | TRUE  | FALSE |
| 7/15/2025 | 25 | IMO     | 24 | 1 |      | FALSE | FALSE | FALSE |
| 7/15/2025 | 25 | IMO     | 24 | 2 |      | FALSE | FALSE | FALSE |
| 7/16/2024 | 25 | Impact  | 24 | 1 | TRUE | TRUE  | FALSE | TRUE  |

|           |    |        |    |   |      |       |       |       |
|-----------|----|--------|----|---|------|-------|-------|-------|
| 7/16/2024 | 25 | Impact | 24 | 2 | TRUE | FALSE | TRUE  | FALSE |
| 7/16/2024 | 25 | Impact | 24 | 3 | TRUE | FALSE | FALSE | TRUE  |
| 7/16/2024 | 25 | Impact | 24 | 4 | TRUE | FALSE | FALSE | TRUE  |
| 7/16/2024 | 25 | IMO    | 24 | 1 | TRUE | FALSE | FALSE | TRUE  |
| 7/16/2024 | 25 | IMO    | 24 | 2 | TRUE | TRUE  | FALSE | TRUE  |
| 7/17/2025 | 25 | Impact | 24 | 1 |      | FALSE | FALSE | FALSE |
| 7/17/2025 | 25 | Impact | 24 | 2 |      | FALSE | FALSE | FALSE |
| 7/17/2025 | 25 | Impact | 24 | 3 |      | FALSE | FALSE | FALSE |
| 7/17/2025 | 25 | Impact | 24 | 4 |      | FALSE | FALSE | FALSE |
| 7/17/2025 | 25 | IMO    | 24 | 1 |      | FALSE | FALSE | FALSE |
| 7/17/2025 | 25 | IMO    | 24 | 2 |      | FALSE | FALSE | FALSE |

---

|                    |    |
|--------------------|----|
| Excluded spheroids | 42 |
| Used spheroids     | 30 |
| Morphology         | 8  |
| Baseline EthD-1    | 28 |
| Image quality      | 15 |

## Fixation and immunohistochemistry of cortical spheroids

**Table 4:** List of antibodies used in the primary antibody solution, as well as their respective concentration and volume used for compression experiments of cortical spheroids.

| Antibody          | Species | Catalog #  | Lot #     | Concentration | Volume ( $\mu\text{L}$ ) |
|-------------------|---------|------------|-----------|---------------|--------------------------|
| GFAP              | Chicken | PA1-10004  | YF3963761 | 1:200         | 7.5                      |
| $\beta$ -III      | Mouse   | MA1-19187  | ZC4239062 | 1:200         | 7.5                      |
| NFL               | Rabbit  | 12998-1-AP | 00110327  | 1:200         | 7.5                      |
| Blocking solution | -       | -          | -         | -             | 1477.5                   |

**Table 5:** List of antibodies used in the secondary antibody solution, as well as their respective concentration, volume and probe wavelength used for compression experiments of cortical spheroids.

| Antibody          | Species | Wavelength | Catalog # | Lot #    | Concentration | Volume ( $\mu\text{L}$ ) |
|-------------------|---------|------------|-----------|----------|---------------|--------------------------|
| GFAP              | Goat    | 555        | A32932    | YB363611 | 1:200         | 7.5                      |
| $\beta$ -III      | Goat    | 647        | A32728    | WE322197 | 1:200         | 7.5                      |
| NFL               | Goat    | 488        | A32731    | WI329965 | 1:200         | 7.5                      |
| Blocking solution | -       | -          | -         | -        | -             | 1477.5                   |

## Quantifying protein recovery

Quantification of protein recovery across the microfluidic device was performed using a standard Rat TNF- $\alpha$  ELISA kit (LEGEND MAX Rat TNF- $\alpha$  ELISA kit, BioLegend, San Diego, CA, USA). Briefly, 2 sets of 250  $\mu\text{L}$  stock solutions of decreasing TNF- $\alpha$  concentrations ranging from 500 to 7.8  $\mu\text{g}/\text{mL}$  were aliquoted into 2 mL tubes and stored in ice. Additionally, 2 more aliquots of the same volume containing a buffer solution were used as a 0  $\mu\text{g}/\text{mL}$  baseline. A 1 mL syringe was loaded with buffer solution and loaded into a syringe pump (Fusion 200, Chemyx, Stafford, TX, USA). The volume of solution was injected into the microfluidic device through the media inlet port at a constant rate of 50  $\mu\text{L}/\text{min}$  (3 mL/hr) after which the recovered volume of solution was collected at the cell culture media reservoir. The recovered solution was stored in an empty 2 mL tube and placed once again in ice. Prior to loading the subsequent solutions, the microfluidic chip was rinsed with 1 mL of distilled water which was injected at a rate of 200  $\mu\text{L}/\text{min}$  (12 mL/hr) and dried by flushing air. The process was repeated for all other solutions after which an ELISA was performed on the recovered solution according to the manufacturer's instructions. A set of aliquots remained in ice for the duration of the experiment and served for calibration and as the known inlet concentration.

## Figures

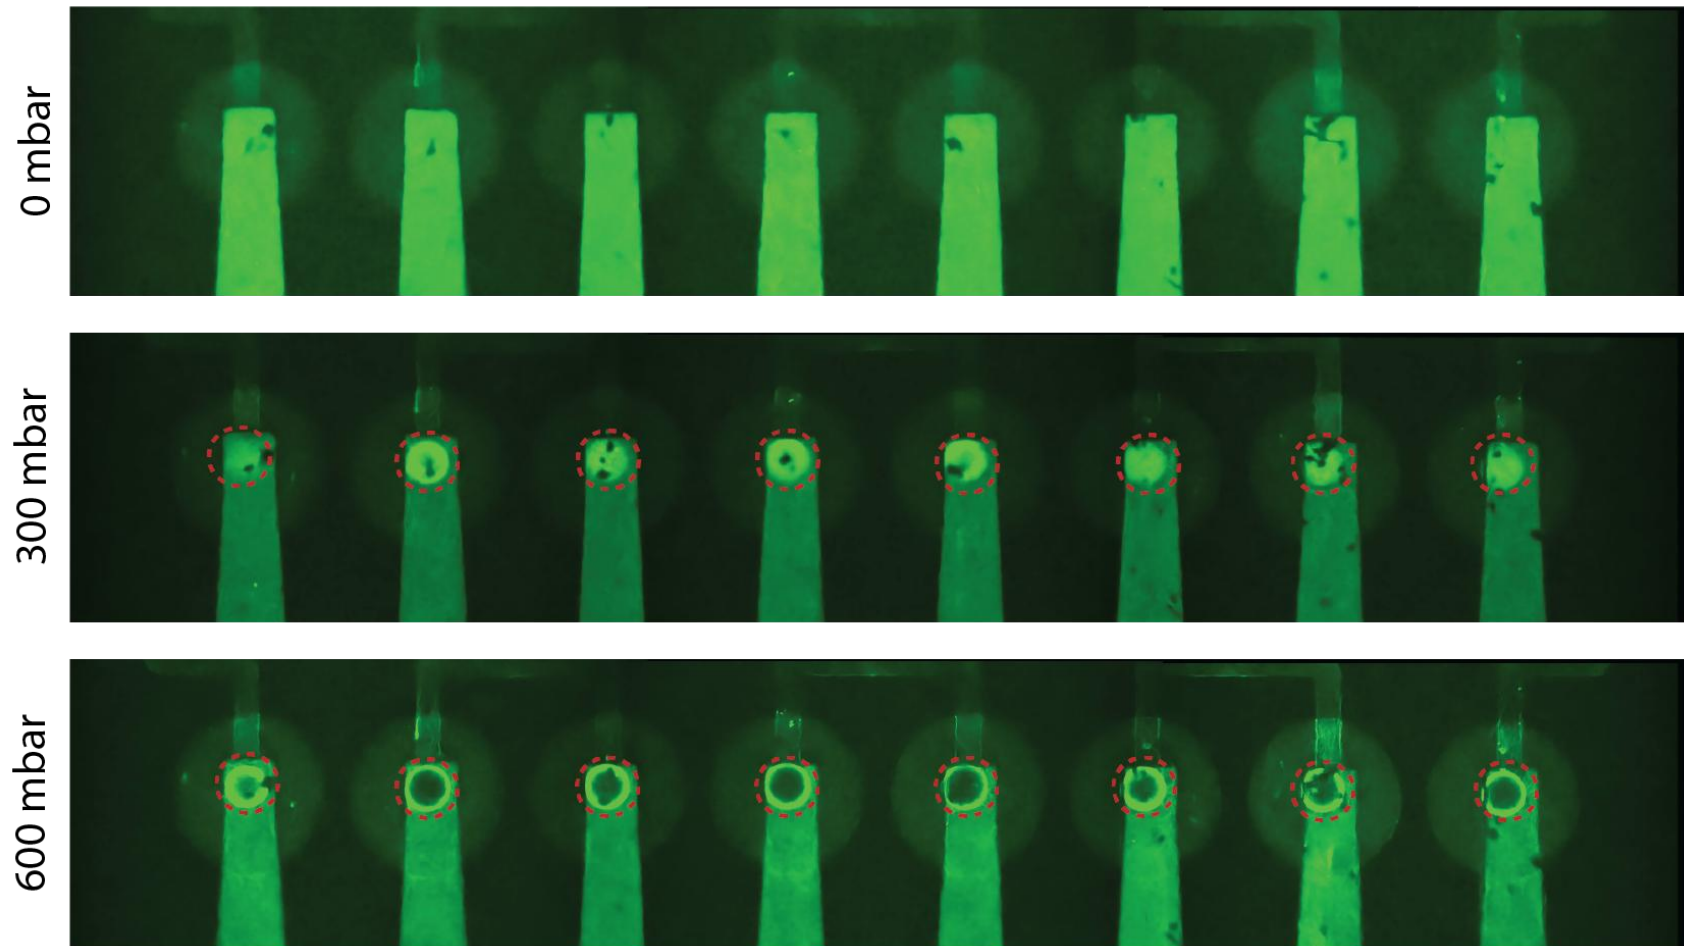

**Figure 1:** Quasi-static response of multiple PDMS pillars under different pressures. Images were taken  $250\ \mu\text{m}$  from the bottom of the cortical spheroid trap. As the pressure increases all the PDMS pillars get in focus at the same time, showing that their displacement is similar across all channels.

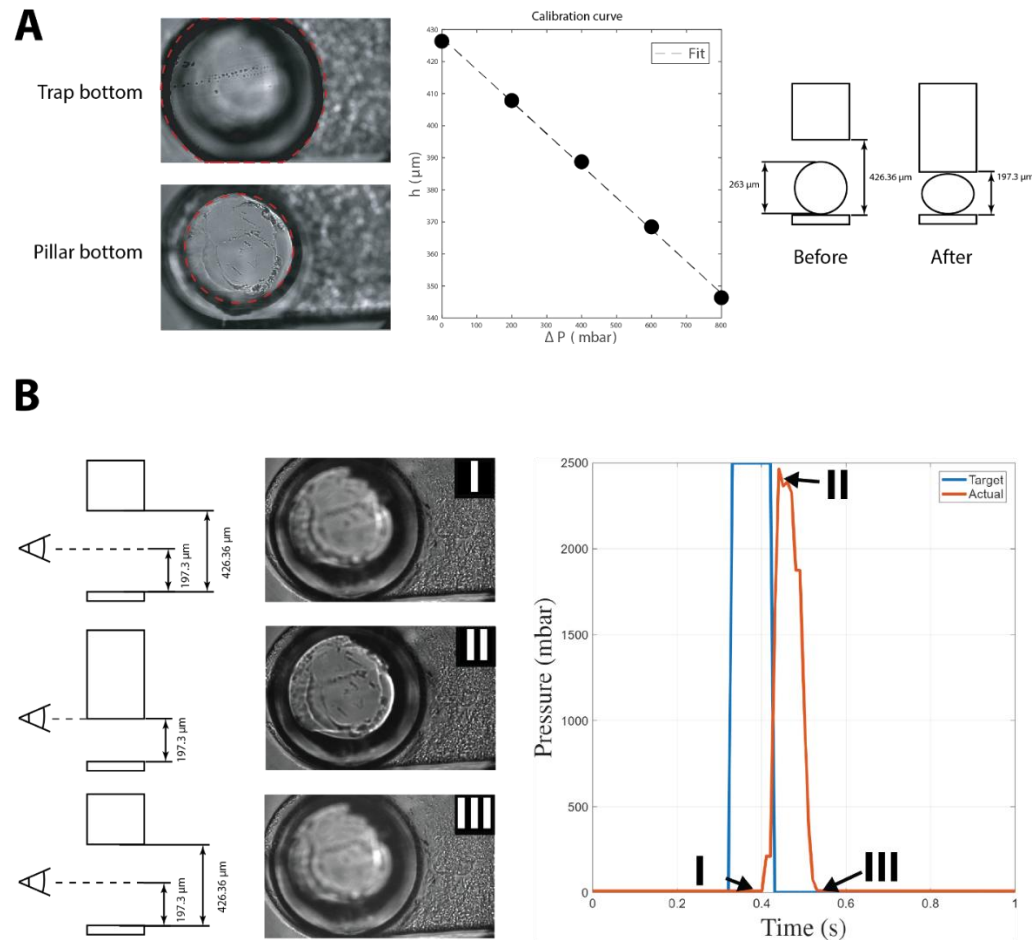

**Figure 2:** Transient response of PDMS pillars under a pressure impulse response. (A) Calibration curve showing the bottom of the spheroid trap, as well as the bottom of the PDMS pillar. Schematic showing the average height of a cortical spheroid of 263  $\mu\text{m}$  in diameter compressed to 25% strain as indicated by the location of the PDMS pillar. (B) Snapshots of a high-speed video recorded at 200 frames per second of the pillar displacement. I) PDMS pillar out of focus moments before the pressure spike. II) PDMS pillar in focus at the required height to achieve 25% strain and at the maximum pressure. III) PDMS pillar returning to its original position after the pressure impulse ends.

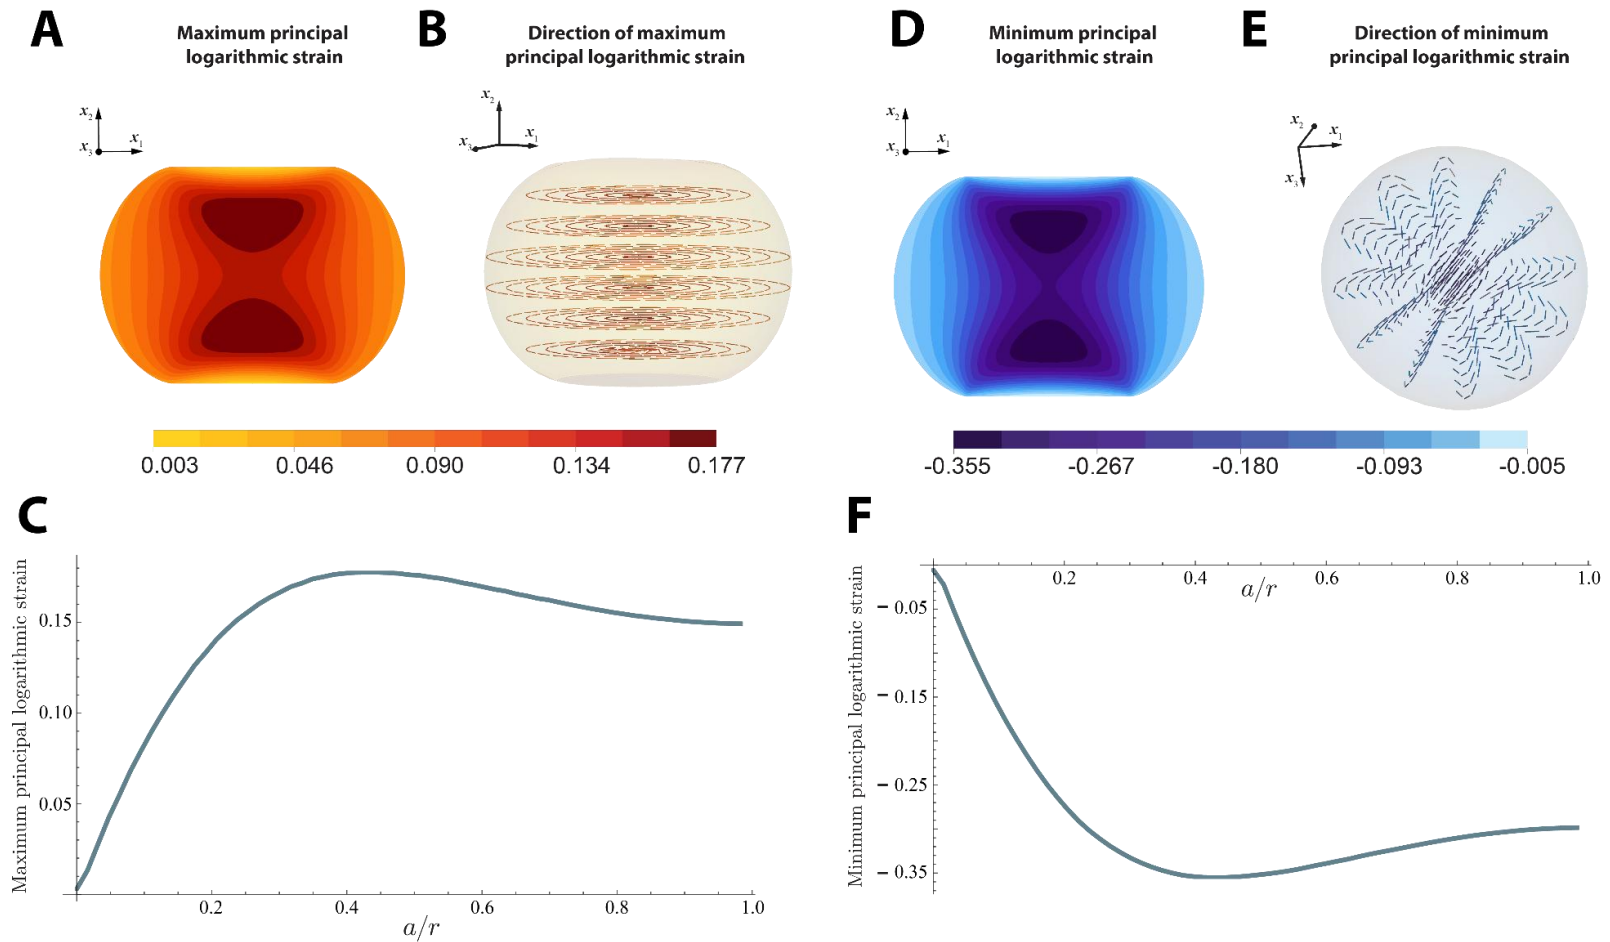

**Figure 3:** Finite element model results for the compression of an idealized 250  $\mu\text{m}$  diameter cortical organoid at 25% prescribed global compressive nominal strain. (A) and (D) Contour plots showing the maximum and minimal principal logarithmic strain, respectively. (B) and (E) Corresponding directions of the maximum and minimum principal logarithmic strains. (C) and (F) Plots of the maximum and minimum logarithmic strains as a function of the ratio of the distance from the bottom of the sphere to its center,  $a$ , to the radius.

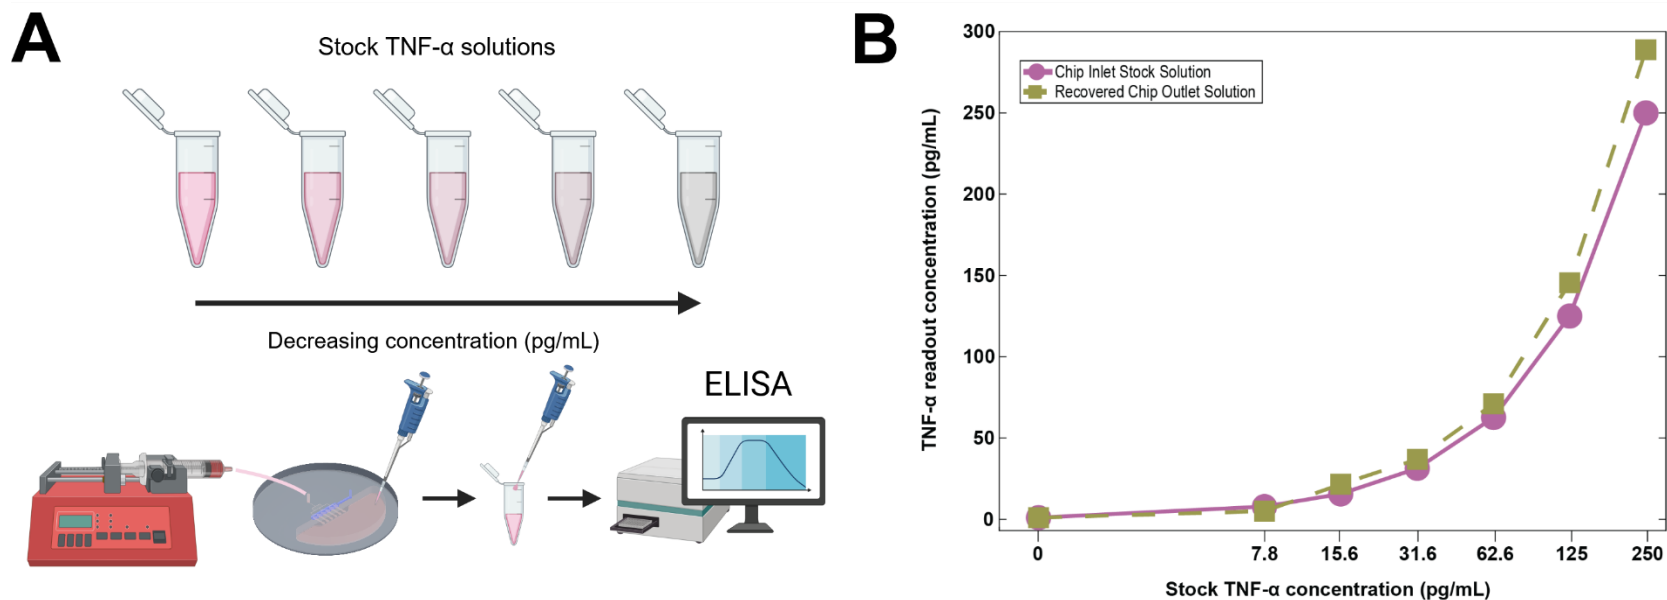

**Figure 4:** Experimental workflow and results for the recovery analysis of TNF- $\alpha$  after being injected into the microfluidic chip simulating the analysis of 0<sup>+</sup> timepoints. (A) Stock solutions of decreasing concentration of TNF- $\alpha$  were aliquoted and subsequently loaded into a syringe pump and injected at a controlled rate (3 mL/hr) in the chip's media inlet. The recovered media was then analyzed using an ELISA plate reader. (B) TNF- $\alpha$  readout concentrations for the chip inlet stock solution and the recovered outlet solution. X-axis is logarithmic scale.
